# Supplementary material
Source: Springer Nature journal article supplement (https://www.springermedizin.de/resource/supplementary/13054_2004_3497_MOESM1_ESM.pdf/9720616)

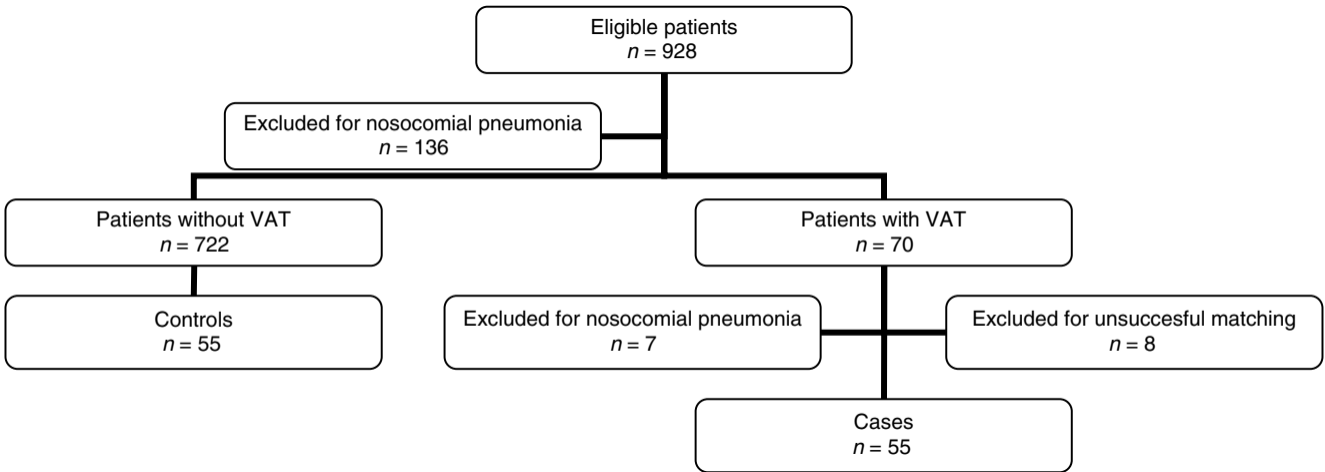

Supplement: MOESM1 [file 9720616]
